# Supplementary material for: „Seefahrercamp“ – Effektivität eines kognitiv-behavioralen Behandlungsprogramms für Kinder mit Traumafolgestörungen von 5 bis 13 Jahren
Source: Atypon-hosted journal article supplement (doi:10.1026/0942-5403/a000262), 2018-08-24
Supplement: 0942-5403_a000262_esm1.pdf [file 0942-5403_a000262_esm1.pdf]

## **ESM 1. Fishers Randomisierungstest**

Der Fishers Randomisierungstest für zwei abhängige Stichproben wurde aufgrund der kleinen Teilstichprobe mit den Daten der CRIES-13 angewendet (vgl. Bortz & Lienert, 2008). Pro Fall wird hierfür die Differenz aus den Messwertpaaren  $T_0$  und  $T_2$  berechnet. Die Prüfgröße  $S$  ergibt sich hierbei aus der Summe dieser Differenzen. Indem die Vorzeichen der Differenzen systematisch variiert werden, wird die Prüfverteilung von  $S$  ermittelt. Hieraus resultieren  $2^n$   $S$ -Werte. Die Formel für die exakte Irrtumswahrscheinlichkeit lautet  $p = (Z + z)/2^n$ . Dabei steht  $n$  für die Stichprobengröße und  $z$  für die Anzahl an  $S$ -Werten der Prüfverteilung, die so groß sind wie der empirische  $S$ -Wert. Bei Variablen, bei denen niedrigere Werte mit einer Verbesserung der Symptome einhergehen, ist  $Z$  die Anzahl an  $S$ -Werten der Prüfverteilung, die größer sind als der empirische  $S$ -Wert. Ab einer Stichprobengröße von  $n = 15$  wird ein  $t$ -Test für abhängige Stichproben (vgl. Bortz 2005) empfohlen.
