# Supplementary material for: „Seefahrercamp“ – Effektivität eines kognitiv-behavioralen Behandlungsprogramms für Kinder mit Traumafolgestörungen von 5 bis 13 Jahren
Source: Atypon-hosted journal article supplement (doi:10.1026/0942-5403/a000262), 2018-08-24
Supplement: 0942-5403_a000262_esm3.pdf [file 0942-5403_a000262_esm3.pdf]

### ESM 3. Berechnung der Responseraten

Die Formel lautet gemäß Jacobson & Truax (1991):  $RCI = (X_2 - X_0) / S_{diffkl}$ , mit  $S_{diffkl} = (2 \times SE_{kl}^2)^{(1/2)}$  und  $SE_{kl} = SD_{kl} \times (1 - r_{ttkl})^{(1/2)}$ . Hierbei stehen  $X_2$  für den Wert eines Kindes zu Therapieabschluss,  $X_0$  für den Wert eines Kindes zu Therapiebeginn,  $SD_{kl}$  für die Standardabweichung der klinischen Population und  $r_{ttkl}$  für die Reliabilität des Messinstruments in der klinischen Population. Bei Fragebögen mit vorhandenen klinischen Normwerten wurden diese zur Schätzung der Populationsstandardabweichung und -reliabilität (Cronbachs  $\alpha$ ) herangezogen. Lagen keine klinischen Normwerte für ein Messinstrument vor, so wurden die Daten anhand der Stichprobendaten zu  $T_0$  geschätzt. Klinische Normwerte konnten für die CBCL/4-18 (Döpfner et al., 1994b), die TRF (Döpfner et al., 1994a) und den KINDL<sup>R</sup> (Ravens-Sieberer et al., 2008) eingesetzt werden. Für das DIKJ wurde die Reliabilität der klinischen Normstichprobe (Stiensmeier-Pelster et al., 2000) herangezogen und die Standardabweichung aus den Stichprobendaten zu  $T_0$  geschätzt. Für die CRIES-13 und die BAV-SE liegen keine klinischen Normstichproben vor, so dass die Reliabilität und die Standardabweichung aus den Stichprobendaten zu  $T_0$  geschätzt wurden.
