# Supplementary material for: „Seefahrercamp“ – Effektivität eines kognitiv-behavioralen Behandlungsprogramms für Kinder mit Traumafolgestörungen von 5 bis 13 Jahren
Source: Atypon-hosted journal article supplement (doi:10.1026/0942-5403/a000262), 2018-08-24
Supplement: 0942-5403_a000262_esm4.pdf [file 0942-5403_a000262_esm4.pdf]

#### **ESM 4. Berechnung der Remissionsraten**

Von Symptomfreiheit kann ausgegangen werden, wenn zwei Kriterien erfüllt sind (vgl. Hiller et al., 2009):

- (a) Ein Grenzwert zwischen psychisch beeinträchtigten und gesunden Kindern muss nach Therapieabschluss unterschritten werden.
- (b) Es wird eine reliable Verbesserung im Sinne des Reliable Change Indexes vorausgesetzt, um zu vermeiden, dass der Grenzwert trotz minimaler Veränderung unterschritten wird.

Nach Jacobson und Truax (1991) kann der Grenzwert auf drei Arten bestimmt werden:

- (a) Der Wert, der zwei Standardabweichungen vom Mittelwert der klinischen Population mit Tendenz zur nicht-klinischen Population liegt.
- (b) Der Wert, der zwei Standardabweichungen vom Mittelwert der nicht-klinischen Population mit Tendenz zur klinischen Population liegt.
- (c) Der Wert, ab dem die Wahrscheinlichkeit höher ist, zu der nicht-klinischen Population statt zu der klinischen Population zu zählen.

Nach der Empfehlung von Jacobson und Truax (1991) sollte bei Vorliegen nicht-klinischer Normen Kriterium (b) oder (c) gewählt werden. Bei einer Überlappung der klinischen und nicht-klinischen Populationsverteilungen sollte Kriterium (c), bei einer Nichtüberlappung Kriterium (b) herangezogen werden. Nur bei fehlender klinischer Norm sollte Kriterium (a) angewendet werden.

Für die deutschsprachige CRIES-13 liegen bisher keine Werte aus einer Normstichprobe vor. Als Grenzwert wurde daher der international gebräuchliche Cut-Off-Wert (Rohwert = 30; Perrin, Meister-Stedmann & Smith, 2005) gewählt. Dabei gingen nur Fälle in die Analyse der Remissionsraten ein, die zu  $T_0$  einen klinisch auffälligen Wert im Sinne des angewandten Cut-off-Wertes aufwiesen. Für die BAV-SE und das DIKJ liegen bisher nur nicht-klinische Normen vor, sodass sich nur das Kriterium (b) heranziehen lässt.

Für die CBCL/4-18 sind sowohl klinische als auch nicht-klinische Normen publiziert. Für die Analyse wurde das Kriterium (b) gewählt, da die Normwerte darauf schließen lassen, dass für alle drei Skalen der CBCL/4-18 und für alle Alters- und Geschlechtsgruppen die Nichtüberlappung der klinischen und nicht-klinischen Populationsverteilungen größer ist als die Überlappung. Für die TRF liegen bisher nur klinische Normen vor, welche die Bestimmung des Kriteriums (a) zulassen würden. Da dieses jedoch in Abhängigkeit der

Verteilungsüberlappung von klinischer und nicht-klinischer Norm wenig konservativ sein kann, wurde für die TRF der im Manual empfohlene Cut-off-Wert für klinische Auffälligkeit (T-Wert = 63; Döpfner et al., 1994a) verwendet.
